# Supplementary material for: A convenient guide to help select replacement solvents for dichloromethane in chromatography
Source: Royal Society of Chemistry journal article supplement (doi:10.1039/c2gc36064k), 2012-01-01
Supplement: c2gc36064k.pdf [file c2gc36064k.pdf]

## Relative Eluting Strengths of Green Chromatography Solvent Mixtures

### Neutral Compounds

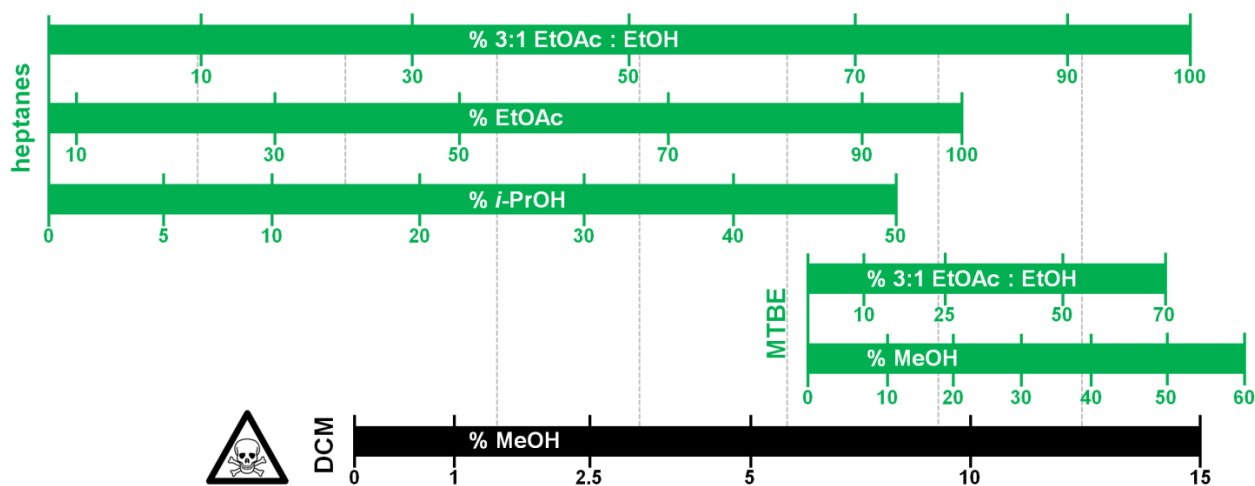

### Basic Compounds

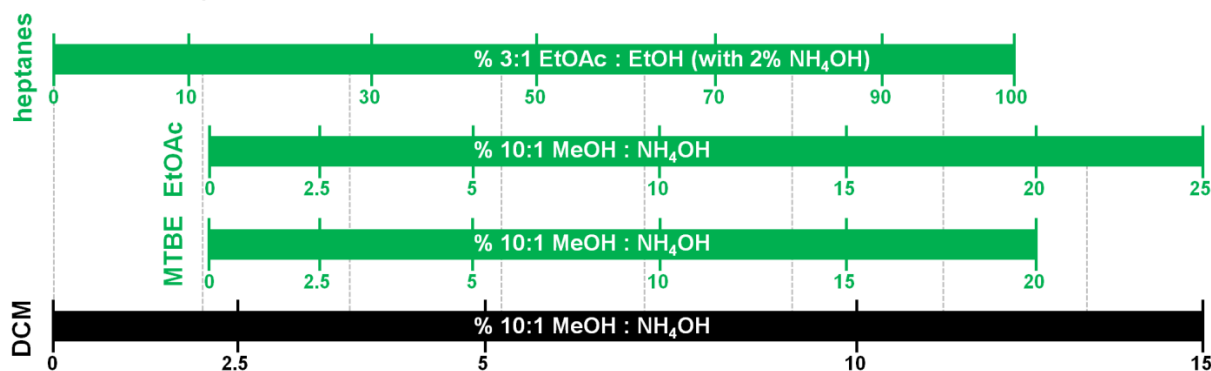

### Acidic Compounds

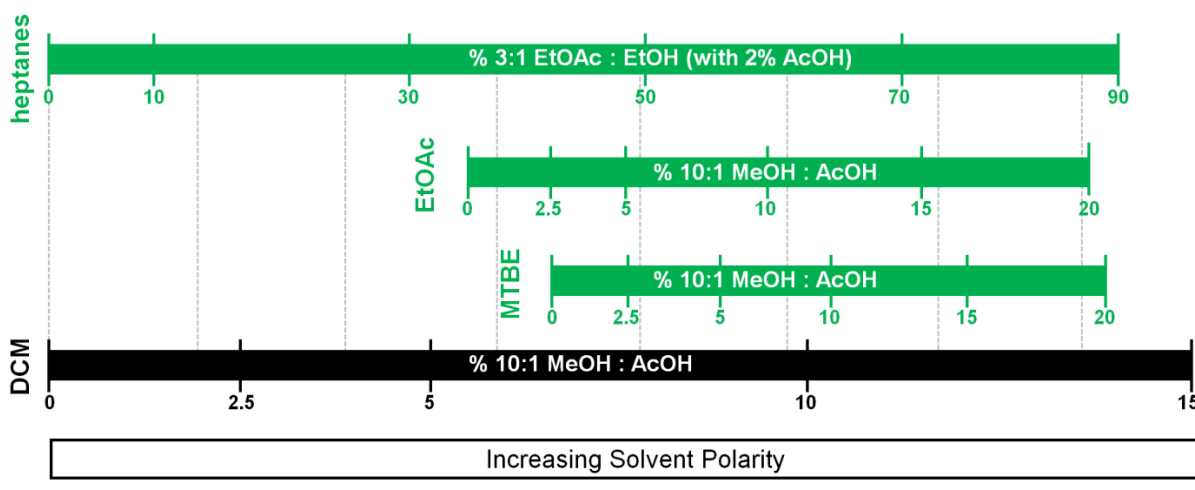

Figure 4. **Green Chromatography Solvent Selection Guide.** Starting from the appropriate DCM/MeOH concentration, compare vertically across the bar chart to identify greener solvent mixtures of similar eluting ability. For example, if a compound suitably elutes in 5% DCM/MeOH in the absence of an additive, the “Neutral Compounds” bar chart predicts that 60% 3:1 EtOAc:EtOH in heptanes or 40% of *i*-PrOH in heptanes would be suitable starting points to evaluate greener solvent alternatives.

## A Convenient Guide for the Selection of Green Chromatography Solvents

### Rf Analysis Method:

The relative eluting strength of a particular solvent mixture was determined by TLC analysis of the test compounds. To do this, all compounds within a subset were spotted in parallel on a single TLC plate (silica gel 60, size: 20 x 20 cm, 250  $\mu$ m thickness, Analtech) by capillary tube, and the compound set was eluted to a height of 15–17 cm with a specific solvent mixture. The compounds were visualized under UV light ( $\lambda$  = 254 nm). Neutral compounds were tested in the neutral solvent systems, basic compounds were tested in solvent systems modified with  $\text{NH}_4\text{OH}$  and the acidic compounds were tested in solvent systems modified with AcOH (Table S1). The retention frequency ( $R_f$ ) value was measured and tabulated for each individual compound (See Tables S2–S9). Then, the individual  $R_f$  values were averaged to give an average retention frequency ( $R_{f_{\text{avg}}}$ ) value for the compound set in that specific solvent mixture. Solvent mixtures were systematically evaluated at varying concentrations of polar eluent. The resulting  $R_{f_{\text{avg}}}$  values were plotted against solvent concentration and linear regression lines were fitted to the data (Fig 2). These regression lines were used to compare the relative eluting abilities of each solvent system (Figures S1–S3).

**Table S1.** Solvent Mixtures Tested

| Neutral Solvent Combinations                               |                                            |                                                 |
|------------------------------------------------------------|--------------------------------------------|-------------------------------------------------|
| Non-polar                                                  | Polar                                      | Measurements<br>(% Polar Eluent)                |
| CH <sub>2</sub> Cl <sub>2</sub>                            | MeOH                                       | 0, 1, 2.5, 5, 10, 15, 20                        |
| EtOAc                                                      |                                            | 0, 10, 20, 30, 40, 50, 60                       |
| MTBE                                                       |                                            | 0, 1, 2.5, 5, 10, 15, 20, 25,<br>30, 40, 50, 60 |
|                                                            |                                            | 3:1 EtOAc: EtOH                                 |
| Heptane                                                    | EtOAc                                      | 0, 10, 20, 30, 40, 50, 60, 70,<br>80, 90, 100   |
|                                                            | 3:1 EtOAc: EtOH                            |                                                 |
|                                                            | Acetone                                    | 5, 10, 20, 30, 40, 50                           |
|                                                            | <i>i</i> PrOH                              |                                                 |
| Basic Solvent Combinations (doped with NH <sub>4</sub> OH) |                                            |                                                 |
| CH <sub>2</sub> Cl <sub>2</sub>                            | 10:1<br>MeOH:NH <sub>4</sub> OH            | 2.5, 5, 10, 15, 20                              |
| MTBE                                                       |                                            | 1, 2.5, 5, 10, 15, 20                           |
| EtOAc                                                      |                                            | 1, 2.5, 5, 10, 15, 20, 25                       |
| Heptane                                                    | 3:1 EtOAc: EtOH<br>(2% NH <sub>4</sub> OH) | 20, 30, 40, 50, 60, 70, 80,<br>90, 100          |
| Acidic Solvent Combinations (doped with AcOH)              |                                            |                                                 |
| CH <sub>2</sub> Cl <sub>2</sub>                            | 10: 1<br>MeOH:AcOH                         | 1, 2.5, 5, 10, 15, 20                           |
| MTBE                                                       |                                            |                                                 |
| EtOAc                                                      |                                            |                                                 |
| Heptane                                                    | 3:1 EtOAc: EtOH<br>(2% AcOH)               | 20, 30, 40, 50, 60, 70, 80,<br>90, 100          |

## Comparison of $R_{f,avg}$ Values in Neutral Solvent Systems

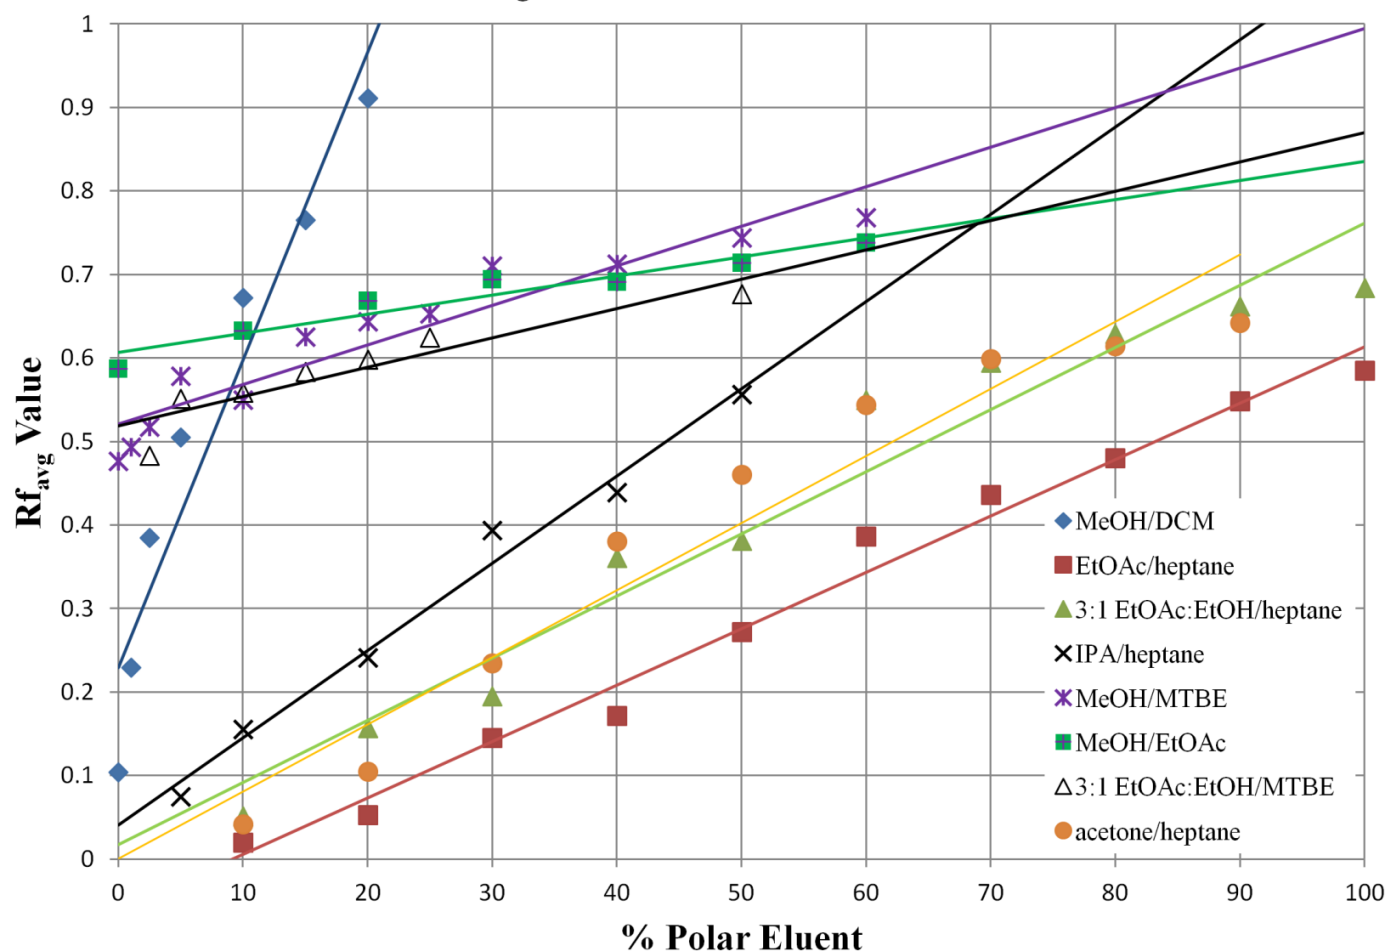

**Figure S1.**  $R_{f,avg}$  values for the neutral compound set tested in neutral solvent systems at increasing concentrations of polar eluent. Linear regression lines can be used to compare relative solvent eluting strength at different solvent concentrations.

Supporting Information  
Taygerly, Miller, Yee and Peterson  
**Table S2.** Individual R<sub>f</sub> values for neutral compounds tested in EtOAc/heptanes and 3:1 EtOAc:EtOH in heptanes

| Compound                                                                            | EtOAc in heptanes |                       |                       |                       |                       |                       |                       |                       |                       |                       |             | 3:1 EtOAc:EtOH in heptanes       |                                  |                                  |                                  |                                  |                                  |                                  |                                  |                                  |                     |
|-------------------------------------------------------------------------------------|-------------------|-----------------------|-----------------------|-----------------------|-----------------------|-----------------------|-----------------------|-----------------------|-----------------------|-----------------------|-------------|----------------------------------|----------------------------------|----------------------------------|----------------------------------|----------------------------------|----------------------------------|----------------------------------|----------------------------------|----------------------------------|---------------------|
|                                                                                     | 100 % Heptane     | 10% EtOAc in heptanes | 20% EtOAc in heptanes | 30% EtOAc in heptanes | 40% EtOAc in heptanes | 50% EtOAc in heptanes | 60% EtOAc in heptanes | 70% EtOAc in heptanes | 80% EtOAc in heptanes | 90% EtOAc in heptanes | 100 % EtOAc | 10% (3:1 EtOAc:EtOH) in heptanes | 20% (3:1 EtOAc:EtOH) in heptanes | 30% (3:1 EtOAc:EtOH) in heptanes | 40% (3:1 EtOAc:EtOH) in heptanes | 50% (3:1 EtOAc:EtOH) in heptanes | 60% (3:1 EtOAc:EtOH) in heptanes | 70% (3:1 EtOAc:EtOH) in heptanes | 80% (3:1 EtOAc:EtOH) in heptanes | 90% (3:1 EtOAc:EtOH) in heptanes | 100% 3:1 EtOAc:EtOH |
| 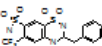   | 0                 | 0                     | 0                     | 0.04                  | 0.07                  | 0.2                   | 0.39                  | 0.47                  | 0.53                  | 0.6                   | 0.66        | 0                                | 0.06                             | 0.11                             | 0.31                             | 0.35                             | 0.55                             | 0.63                             | 0.63                             | 0.71                             | 0.73                |
|    | 0                 | 0                     | 0.02                  | 0.09                  | 0.11                  | 0.18                  | 0.28                  | 0.33                  | 0.37                  | 0.44                  | 0.49        | 0.02                             | 0.12                             | 0.17                             | 0.31                             | 0.3                              | 0.5                              | 0.54                             | 0.58                             | 0.61                             | 0.63                |
|    | 0                 | 0                     | 0                     | 0.04                  | 0.06                  | 0.16                  | 0.31                  | 0.38                  | 0.46                  | 0.55                  | 0.61        | 0                                | 0.07                             | 0.12                             | 0.3                              | 0.32                             | 0.52                             | 0.59                             | 0.62                             | 0.68                             | 0.7                 |
|    | 0                 | 0                     | 0.04                  | 0.12                  | 0.15                  | 0.25                  | 0.35                  | 0.4                   | 0.44                  | 0.51                  | 0.54        | 0.05                             | 0.17                             | 0.21                             | 0.36                             | 0.39                             | 0.54                             | 0.58                             | 0.62                             | 0.64                             | 0.67                |
|  | 0                 | 0.03                  | 0.07                  | 0.22                  | 0.24                  | 0.36                  | 0.46                  | 0.51                  | 0.54                  | 0.59                  | 0.62        | 0.07                             | 0.2                              | 0.24                             | 0.4                              | 0.43                             | 0.57                             | 0.61                             | 0.65                             | 0.67                             | 0.69                |
|  | 0                 | 0.08                  | 0.15                  | 0.28                  | 0.3                   | 0.4                   | 0.47                  | 0.51                  | 0.53                  | 0.57                  | 0.59        | 0.15                             | 0.26                             | 0.29                             | 0.42                             | 0.44                             | 0.57                             | 0.59                             | 0.63                             | 0.65                             | 0.67                |
|  | 0                 | 0.02                  | 0.04                  | 0.15                  | 0.18                  | 0.3                   | 0.42                  | 0.47                  | 0.51                  | 0.58                  | 0.6         | 0.05                             | 0.16                             | 0.2                              | 0.37                             | 0.4                              | 0.55                             | 0.6                              | 0.62                             | 0.66                             | 0.68                |
|  | 0                 | 0                     | 0.02                  | 0.03                  | 0.06                  | 0.1                   | 0.23                  | 0.26                  | 0.33                  | 0.46                  | 0.5         | 0                                | 0.07                             | 0.08                             | 0.28                             | 0.28                             | 0.51                             | 0.55                             | 0.62                             | 0.64                             | 0.67                |
|  | 0                 | 0.05                  | 0.14                  | 0.35                  | 0.39                  | 0.52                  | 0.6                   | 0.63                  | 0.65                  | 0.68                  | 0.7         | 0.13                             | 0.31                             | 0.35                             | 0.52                             | 0.55                             | 0.67                             | 0.69                             | 0.72                             | 0.73                             | 0.74                |
| Average (R <sub>f</sub> <sub>ave</sub> )                                            | 0.00              | 0.02                  | 0.05                  | 0.15                  | 0.17                  | 0.27                  | 0.39                  | 0.44                  | 0.48                  | 0.55                  | 0.59        | 0.05                             | 0.16                             | 0.20                             | 0.36                             | 0.38                             | 0.55                             | 0.60                             | 0.63                             | 0.67                             | 0.69                |

Supporting Information  
Taygerly, Miller, Yee and Peterson  
**Table S3.** Individual R<sub>f</sub> values for neutral compounds tested in *i*-ProH/heptanes and acetone/heptanes

| Compound                                                                           | i-ProH in heptanes    |                        |                        |                        |                        |                        | Acetone in heptanes     |                         |                         |                         |                         |                         |                         |                         |                         |              |
|------------------------------------------------------------------------------------|-----------------------|------------------------|------------------------|------------------------|------------------------|------------------------|-------------------------|-------------------------|-------------------------|-------------------------|-------------------------|-------------------------|-------------------------|-------------------------|-------------------------|--------------|
|                                                                                    | 5% i-ProH in heptanes | 10% i-ProH in heptanes | 20% i-ProH in heptanes | 30% i-ProH in heptanes | 40% i-ProH in heptanes | 50% i-ProH in heptanes | 10% acetone in heptanes | 20% acetone in heptanes | 30% acetone in heptanes | 40% acetone in heptanes | 50% acetone in heptanes | 60% acetone in heptanes | 70% acetone in heptanes | 80% acetone in heptanes | 90% acetone in heptanes | 100% acetone |
| 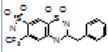   | 0                     | 0.05                   | 0.14                   | 0.35                   | 0.42                   | 0.58                   | 0                       | 0.03                    | 0.09                    | 0.24                    | 0.38                    | 0.52                    | 0.59                    | 0.62                    | 0.67                    | 0.7          |
|    | 0.03                  | 0.1                    | 0.13                   | 0.35                   | 0.4                    | 0.52                   | 0.03                    | 0.1                     | 0.22                    | 0.38                    | 0.43                    | 0.52                    | 0.56                    | 0.58                    | 0.61                    | 0.64         |
|    | 0                     | 0.07                   | 0.15                   | 0.35                   | 0.4                    | 0.55                   | 0                       | 0.04                    | 0.13                    | 0.29                    | 0.4                     | 0.51                    | 0.59                    | 0.62                    | 0.65                    | 0.68         |
|    | 0.1                   | 0.19                   | 0.28                   | 0.4                    | 0.45                   | 0.54                   | 0.04                    | 0.1                     | 0.25                    | 0.41                    | 0.47                    | 0.54                    | 0.59                    | 0.6                     | 0.63                    | 0.65         |
|   | 0.07                  | 0.14                   | 0.23                   | 0.35                   | 0.4                    | 0.5                    | 0.05                    | 0.13                    | 0.3                     | 0.46                    | 0.53                    | 0.59                    | 0.64                    | 0.65                    | 0.66                    | 0.68         |
|  | 0.18                  | 0.26                   | 0.33                   | 0.42                   | 0.46                   | 0.55                   | 0.15                    | 0.22                    | 0.38                    | 0.52                    | 0.57                    | 0.61                    | 0.64                    | 0.64                    | 0.64                    | 0.66         |
|  | 0.09                  | 0.19                   | 0.3                    | 0.44                   | 0.48                   | 0.59                   | 0.04                    | 0.12                    | 0.28                    | 0.43                    | 0.51                    | 0.58                    | 0.62                    | 0.62                    | 0.65                    | 0.66         |
|  | 0.03                  | 0.09                   | 0.2                    | 0.38                   | 0.4                    | 0.55                   | 0                       | 0.03                    | 0.09                    | 0.17                    | 0.29                    | 0.39                    | 0.51                    | 0.54                    | 0.59                    | 0.64         |
|  | 0.18                  | 0.32                   | 0.43                   | 0.53                   | 0.57                   | 0.66                   | 0.07                    | 0.18                    | 0.39                    | 0.55                    | 0.59                    | 0.67                    | 0.68                    | 0.69                    | 0.71                    | 0.73         |
| Average (R <sub>f_ave</sub> )                                                      | 0.08                  | 0.16                   | 0.24                   | 0.40                   | 0.44                   | 0.56                   | 0.04                    | 0.11                    | 0.24                    | 0.38                    | 0.46                    | 0.55                    | 0.60                    | 0.62                    | 0.65                    | 0.67         |

Supporting Information  
Taygerly, Miller, Yee and Peterson  
**Table S4.** Individual R<sub>f</sub> values for neutral compounds tested in MeOH/DCM and MeOH/EtOAc

| Compound                                                                           | MeOH in DCM |                |                  |                |                 |                 |                 | MeOH in EtOAc |                   |                   |                   |                   |                   |                   |
|------------------------------------------------------------------------------------|-------------|----------------|------------------|----------------|-----------------|-----------------|-----------------|---------------|-------------------|-------------------|-------------------|-------------------|-------------------|-------------------|
|                                                                                    | 100% DCM    | 1% MeOH in DCM | 2.5% MeOH in DCM | 5% MeOH in DCM | 10% MeOH in DCM | 15% MeOH in DCM | 20% MeOH in DCM | 100 % EtOAc   | 10% MeOH in EtOAc | 20% MeOH in EtOAc | 30% MeOH in EtOAc | 40% MeOH in EtOAc | 50% MeOH in EtOAc | 60% MeOH in EtOAc |
| 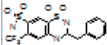   | 0           | 0.03           | 0.11             | 0.29           | 0.55            | 0.69            | 0.9             | 0.67          | 0.67              | 0.71              | 0.73              | 0.73              | 0.75              | 0.77              |
|    | 0.03        | 0.11           | 0.24             | 0.39           | 0.59            | 0.69            | 0.87            | 0.49          | 0.58              | 0.62              | 0.66              | 0.65              | 0.69              | 0.71              |
|    | 0           | 0.05           | 0.16             | 0.37           | 0.6             | 0.7             | 0.91            | 0.6           | 0.64              | 0.68              | 0.7               | 0.7               | 0.72              | 0.74              |
|    | 0.04        | 0.18           | 0.39             | 0.58           | 0.71            | 0.79            | 0.93            | 0.55          | 0.62              | 0.65              | 0.68              | 0.68              | 0.71              | 0.73              |
|   | 0.28        | 0.51           | 0.64             | 0.71           | 0.79            | 0.85            | 0.94            | 0.62          | 0.65              | 0.69              | 0.71              | 0.7               | 0.71              | 0.74              |
|  | 0.27        | 0.52           | 0.67             | 0.74           | 0.82            | 0.87            | 0.95            | 0.59          | 0.62              | 0.65              | 0.67              | 0.67              | 0.69              | 0.71              |
|  | 0.08        | 0.25           | 0.51             | 0.62           | 0.74            | 0.82            | 0.92            | 0.61          | 0.62              | 0.65              | 0.67              | 0.67              | 0.69              | 0.71              |
|  | 0           | 0              | 0.13             | 0.17           | 0.47            | 0.64            | 0.86            | 0.5           | 0.61              | 0.65              | 0.69              | 0.69              | 0.7               | 0.74              |
|  | 0.25        | 0.44           | 0.64             | 0.7            | 0.8             | 0.85            | 0.93            | 0.7           | 0.71              | 0.74              | 0.76              | 0.75              | 0.78              | 0.81              |
| Average (R <sub>f</sub> <sub>ave</sub> )                                           | 0.11        | 0.23           | 0.39             | 0.51           | 0.67            | 0.77            | 0.91            | 0.59          | 0.64              | 0.67              | 0.70              | 0.69              | 0.72              | 0.74              |

Supporting Information  
Taygerly, Miller, Yee and Peterson  
**Table S5.** Individual R<sub>f</sub> values for neutral compounds tested in MeOH/MTBE and 3:1 EtOAc:EtOH in MTBE

| Compound                                                                           | MeOH in MTBE |                 |                   |                 |                  |                  |                  |                  |                  |                  |                  |                  | 3:1 EtOAc:EtOH in MTBE       |                              |                              |                              |                              |                              |
|------------------------------------------------------------------------------------|--------------|-----------------|-------------------|-----------------|------------------|------------------|------------------|------------------|------------------|------------------|------------------|------------------|------------------------------|------------------------------|------------------------------|------------------------------|------------------------------|------------------------------|
|                                                                                    | 100 % MTBE   | 1% MeOH in MTBE | 2.5% MeOH in MTBE | 5% MeOH in MTBE | 10% MeOH in MTBE | 15% MeOH in MTBE | 20% MeOH in MTBE | 25% MeOH in MTBE | 30% MeOH in MTBE | 40% MeOH in MTBE | 50% MeOH in MTBE | 60% MeOH in MTBE | 10% (3:1 EtOAc:EtOH) in MTBE | 15% (3:1 EtOAc:EtOH) in MTBE | 20% (3:1 EtOAc:EtOH) in MTBE | 25% (3:1 EtOAc:EtOH) in MTBE | 50% (3:1 EtOAc:EtOH) in MTBE | 75% (3:1 EtOAc:EtOH) in MTBE |
| 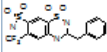   | 0.53         | 0.53            | 0.56              | 0.58            | 0.59             | 0.64             | 0.68             | 0.69             | 0.73             | 0.75             | 0.78             | 0.79             | 0.61                         | 0.64                         | 0.65                         | 0.67                         | 0.72                         | 0.73                         |
|    | 0.3          | 0.35            | 0.37              | 0.5             | 0.47             | 0.57             | 0.58             | 0.61             | 0.67             | 0.68             | 0.72             | 0.75             | 0.42                         | 0.46                         | 0.5                          | 0.52                         | 0.6                          | 0.62                         |
|    | 0.46         | 0.47            | 0.51              | 0.56            | 0.55             | 0.63             | 0.65             | 0.66             | 0.72             | 0.72             | 0.76             | 0.78             | 0.57                         | 0.61                         | 0.62                         | 0.65                         | 0.7                          | 0.7                          |
|    | 0.46         | 0.48            | 0.51              | 0.59            | 0.55             | 0.62             | 0.63             | 0.64             | 0.7              | 0.7              | 0.73             | 0.76             | 0.55                         | 0.57                         | 0.59                         | 0.61                         | 0.66                         | 0.66                         |
|   | 0.49         | 0.51            | 0.54              | 0.6             | 0.56             | 0.64             | 0.66             | 0.66             | 0.72             | 0.72             | 0.74             | 0.77             | 0.57                         | 0.59                         | 0.61                         | 0.63                         | 0.68                         | 0.68                         |
|  | 0.5          | 0.52            | 0.53              | 0.59            | 0.54             | 0.62             | 0.63             | 0.63             | 0.69             | 0.68             | 0.71             | 0.73             | 0.56                         | 0.58                         | 0.59                         | 0.62                         | 0.66                         | 0.66                         |
|  | 0.53         | 0.54            | 0.55              | 0.59            | 0.56             | 0.61             | 0.63             | 0.63             | 0.69             | 0.68             | 0.72             | 0.74             | 0.6                          | 0.61                         | 0.62                         | 0.65                         | 0.68                         | 0.68                         |
|  | 0.42         | 0.42            | 0.47              | 0.55            | 0.52             | 0.62             | 0.63             | 0.65             | 0.71             | 0.72             | 0.75             | 0.78             | 0.51                         | 0.54                         | 0.55                         | 0.59                         | 0.67                         | 0.67                         |
|  | 0.64         | 0.66            | 0.66              | 0.68            | 0.64             | 0.71             | 0.73             | 0.73             | 0.79             | 0.79             | 0.81             | 0.83             | 0.68                         | 0.7                          | 0.7                          | 0.73                         | 0.75                         | 0.75                         |
| Average (R <sub>f</sub> <sub>ave</sub> )                                           | 0.48         | 0.50            | 0.52              | 0.58            | 0.55             | 0.63             | 0.65             | 0.66             | 0.71             | 0.72             | 0.75             | 0.77             | 0.56                         | 0.59                         | 0.60                         | 0.63                         | 0.68                         | 0.68                         |

## Comparison of $R_{f,avg}$ Values for Basic Compounds in Solvent Systems Modified with $NH_4OH$

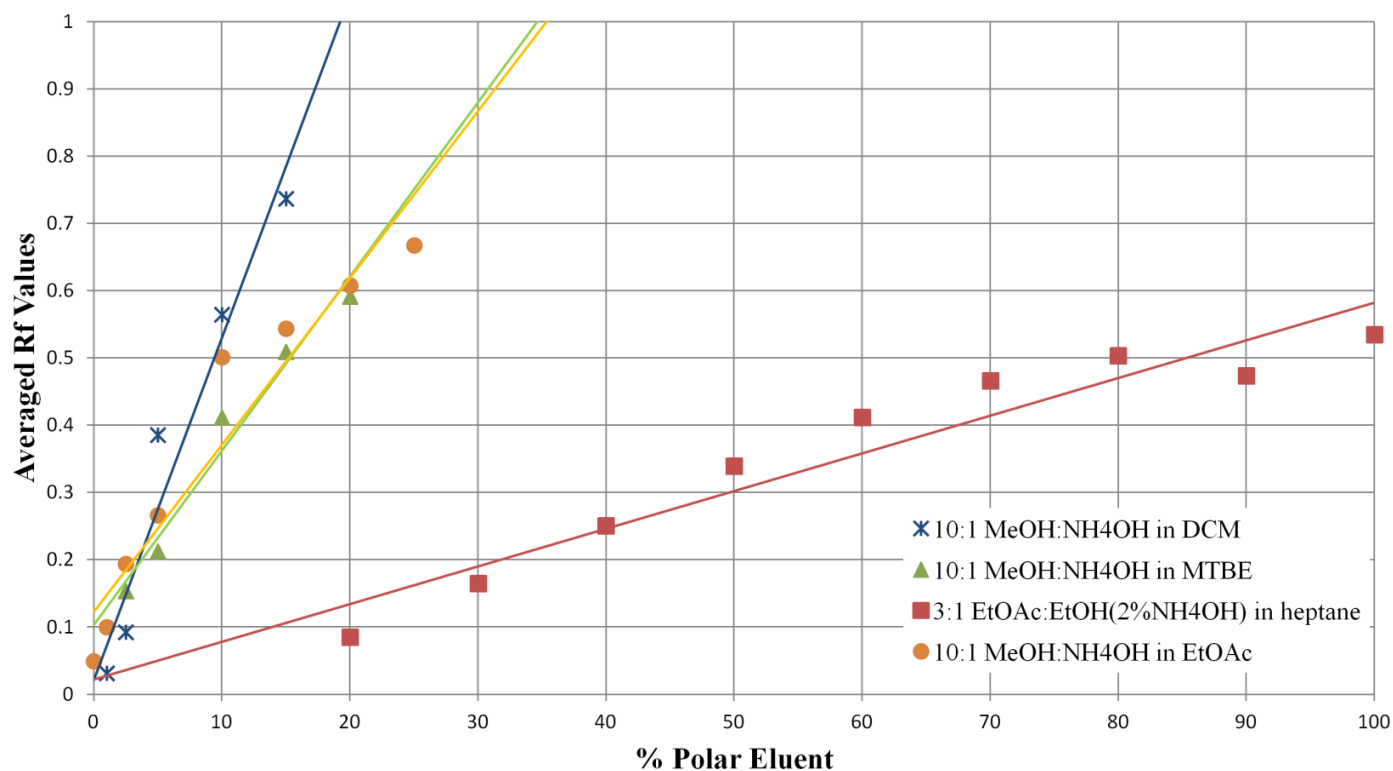

**Figure S2.**  $R_{f,avg}$  values for the basic compound set tested in solvent systems modified with  $NH_4OH$  at increasing concentrations of polar eluent. Linear regression lines can be used to compare relative solvent eluting strength at different solvent concentrations.

Supporting Information

**Table S6.** Individual R<sub>f</sub> values for basic compounds tested in MeOH/DCM, 10:1 MeOH:NH<sub>4</sub>OH in DCM, and 10:1 MeOH:NH<sub>4</sub>OH in MTBE

| Compound                                                                            | 2.5% MeOH in DCM | 5% MeOH in DCM | 10% MeOH in DCM | 15% MeOH in DCM | 20% MeOH in DCM | 1% (10:1 MeOH:NH <sub>4</sub> OH) in DCM | 2.5% (10:1 MeOH:NH <sub>4</sub> OH) in DCM | 5% (10:1 MeOH:NH <sub>4</sub> OH) in DCM | 10% (10:1 MeOH:NH <sub>4</sub> OH) in DCM | 20% (10:1 MeOH:NH <sub>4</sub> OH) in DCM | 2.5% (10:1 MeOH:NH <sub>4</sub> OH) in MTBE | 5% (10:1 MeOH:NH <sub>4</sub> OH) in MTBE | 10% (10:1 MeOH:NH <sub>4</sub> OH) in MTBE | 15% (10:1 MeOH:NH <sub>4</sub> OH) in MTBE | 20% (10:1 MeOH:NH <sub>4</sub> OH) in MTBE |
|-------------------------------------------------------------------------------------|------------------|----------------|-----------------|-----------------|-----------------|------------------------------------------|--------------------------------------------|------------------------------------------|-------------------------------------------|-------------------------------------------|---------------------------------------------|-------------------------------------------|--------------------------------------------|--------------------------------------------|--------------------------------------------|
| 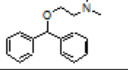   | 0.02             | 0.12           | 0.33            | 0.38            | 0.5             | 0.03                                     | 0.1                                        | 0.42                                     | 0.61                                      | 0.84                                      | 0.2                                         | 0.26                                      | 0.5                                        | 0.57                                       | 0.65                                       |
|    | 0.02             | 0.13           | 0.36            | 0.41            | 0.55            | 0.03                                     | 0.1                                        | 0.44                                     | 0.64                                      | 0.82                                      | 0.25                                        | 0.3                                       | 0.55                                       | 0.63                                       | 0.69                                       |
|    | 0.03             | 0.22           | 0.53            | 0.57            | 0.76            | 0.02                                     | 0.08                                       | 0.41                                     | 0.62                                      | 0.82                                      | 0.09                                        | 0.14                                      | 0.35                                       | 0.46                                       | 0.55                                       |
|   | 0.03             | 0.21           | 0.55            | 0.58            | 0.76            | 0.03                                     | 0.1                                        | 0.42                                     | 0.59                                      | 0.79                                      | 0.1                                         | 0.15                                      | 0.36                                       | 0.49                                       | 0.57                                       |
|  | 0.04             | 0.19           | 0.52            | 0.56            | 0.71            | 0.02                                     | 0.08                                       | 0.45                                     | 0.66                                      | 0.67                                      | 0.3                                         | 0.4                                       | 0.59                                       | 0.68                                       | 0.72                                       |
|  | 0.08             | 0.36           | 0.67            | 0.69            | 0.83            | 0.08                                     | 0.19                                       | 0.67                                     | 0.78                                      | 0.9                                       | 0.2                                         | 0.28                                      | 0.49                                       | 0.58                                       | 0.65                                       |
|  | 0.03             | 0.21           | 0.57            | 0.62            | 0.77            | 0.03                                     | 0.1                                        | 0.45                                     | 0.71                                      | 0.88                                      | 0.09                                        | 0.18                                      | 0.43                                       | 0.57                                       | 0.68                                       |
|  | 0.02             | 0.05           | 0.07            | 0.13            | 0.1             | 0.02                                     | 0.04                                       | 0.09                                     | 0.18                                      | 0.42                                      | 0.04                                        | 0.05                                      | 0.18                                       | 0.23                                       | 0.34                                       |
| Average (R <sub>f</sub> <sub>ave</sub> )                                            | 0.03             | 0.19           | 0.45            | 0.49            | 0.62            | 0.03                                     | 0.10                                       | 0.42                                     | 0.60                                      | 0.77                                      | 0.16                                        | 0.22                                      | 0.43                                       | 0.53                                       | 0.61                                       |

Supporting Information

Taygerly, Miller, Yee and Peterson

**Table S7.** Individual R<sub>f</sub> values for basic compounds tested in 3:1 EtOAc:EtOH(modified with 2% NH<sub>4</sub>OH) and 10:1 MeOH:NH<sub>4</sub>OH in EtOAc.

| Compound                                                                            | 20% 3:1 EtOAc:EtOH (2%NH <sub>4</sub> OH) in he | 30% 3:1 EtOAc:EtOH (2%NH <sub>4</sub> OH) in he | 40% 3:1 EtOAc:EtOH (2%NH <sub>4</sub> OH) in he | 50% 3:1 EtOAc:EtOH (2%NH <sub>4</sub> OH) in he | 60% 3:1 EtOAc:EtOH (2%NH <sub>4</sub> OH) in he | 70% 3:1 EtOAc:EtOH (2%NH <sub>4</sub> OH) in he | 80% 3:1 EtOAc:EtOH (2%NH <sub>4</sub> OH) in he | 90% 3:1 EtOAc:EtOH (2%NH <sub>4</sub> OH) in he | 100% 3:1 EtOAc:EtOH (2%NH <sub>4</sub> OH) | 100% EtOAc | 1% (10:1 MeOH:NH <sub>4</sub> OH) in EtOAc | 2.5% (10:1 MeOH:NH <sub>4</sub> OH) in EtOAc | 5% (10:1 MeOH:NH <sub>4</sub> OH) in EtOAc | 10% (10:1 MeOH:NH <sub>4</sub> OH) in EtOAc | 15% (10:1 MeOH:NH <sub>4</sub> OH) in EtOAc | 20% (10:1 MeOH:NH <sub>4</sub> OH) in EtOAc | 25% (10:1 MeOH:NH <sub>4</sub> OH) in EtOAc |
|-------------------------------------------------------------------------------------|-------------------------------------------------|-------------------------------------------------|-------------------------------------------------|-------------------------------------------------|-------------------------------------------------|-------------------------------------------------|-------------------------------------------------|-------------------------------------------------|--------------------------------------------|------------|--------------------------------------------|----------------------------------------------|--------------------------------------------|---------------------------------------------|---------------------------------------------|---------------------------------------------|---------------------------------------------|
| 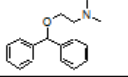   | 0.15                                            | 0.27                                            | 0.35                                            | 0.42                                            | 0.46                                            | 0.52                                            | 0.51                                            | 0.51                                            | 0.53                                       | 0          | 0.07                                       | 0.14                                         | 0.21                                       | 0.47                                        | 0.49                                        | 0.57                                        | 0.64                                        |
|    | 0.11                                            | 0.23                                            | 0.34                                            | 0.43                                            | 0.51                                            | 0.57                                            | 0.6                                             | 0.56                                            | 0.61                                       | 0.03       | 0.08                                       | 0.2                                          | 0.29                                       | 0.54                                        | 0.57                                        | 0.63                                        | 0.69                                        |
|    | 0.06                                            | 0.12                                            | 0.2                                             | 0.29                                            | 0.38                                            | 0.44                                            | 0.5                                             | 0.45                                            | 0.54                                       | 0.03       | 0.05                                       | 0.12                                         | 0.21                                       | 0.45                                        | 0.5                                         | 0.57                                        | 0.64                                        |
|   | 0.07                                            | 0.14                                            | 0.22                                            | 0.32                                            | 0.39                                            | 0.45                                            | 0.49                                            | 0.46                                            | 0.52                                       | 0.03       | 0.05                                       | 0.13                                         | 0.2                                        | 0.44                                        | 0.49                                        | 0.57                                        | 0.63                                        |
|  | 0.14                                            | 0.28                                            | 0.39                                            | 0.5                                             | 0.58                                            | 0.63                                            | 0.66                                            | 0.61                                            | 0.67                                       | 0.1        | 0.2                                        | 0.33                                         | 0.4                                        | 0.62                                        | 0.65                                        | 0.68                                        | 0.72                                        |
|  | 0.09                                            | 0.19                                            | 0.3                                             | 0.41                                            | 0.51                                            | 0.56                                            | 0.61                                            | 0.56                                            | 0.63                                       | 0.05       | 0.1                                        | 0.26                                         | 0.34                                       | 0.57                                        | 0.6                                         | 0.66                                        | 0.71                                        |
|  | 0.08                                            | 0.16                                            | 0.27                                            | 0.38                                            | 0.48                                            | 0.53                                            | 0.59                                            | 0.53                                            | 0.62                                       | 0.04       | 0.09                                       | 0.17                                         | 0.24                                       | 0.54                                        | 0.59                                        | 0.65                                        | 0.7                                         |
|  | 0.04                                            | 0.04                                            | 0.08                                            | 0.09                                            | 0.13                                            | 0.14                                            | 0.17                                            | 0.19                                            | 0.21                                       | 0.04       | 0.04                                       | 0.06                                         | 0.06                                       | 0.14                                        | 0.13                                        | 0.28                                        |                                             |
| Average (R <sub>f</sub> <sub>ave</sub> )                                            | 0.09                                            | 0.18                                            | 0.27                                            | 0.36                                            | 0.43                                            | 0.48                                            | 0.52                                            | 0.48                                            | 0.54                                       | 0.04       | 0.09                                       | 0.18                                         | 0.24                                       | 0.47                                        | 0.50                                        | 0.58                                        | 0.68                                        |

## Comparison of $R_{f,avg}$ Values in Solvent Systems Modified with AcOH

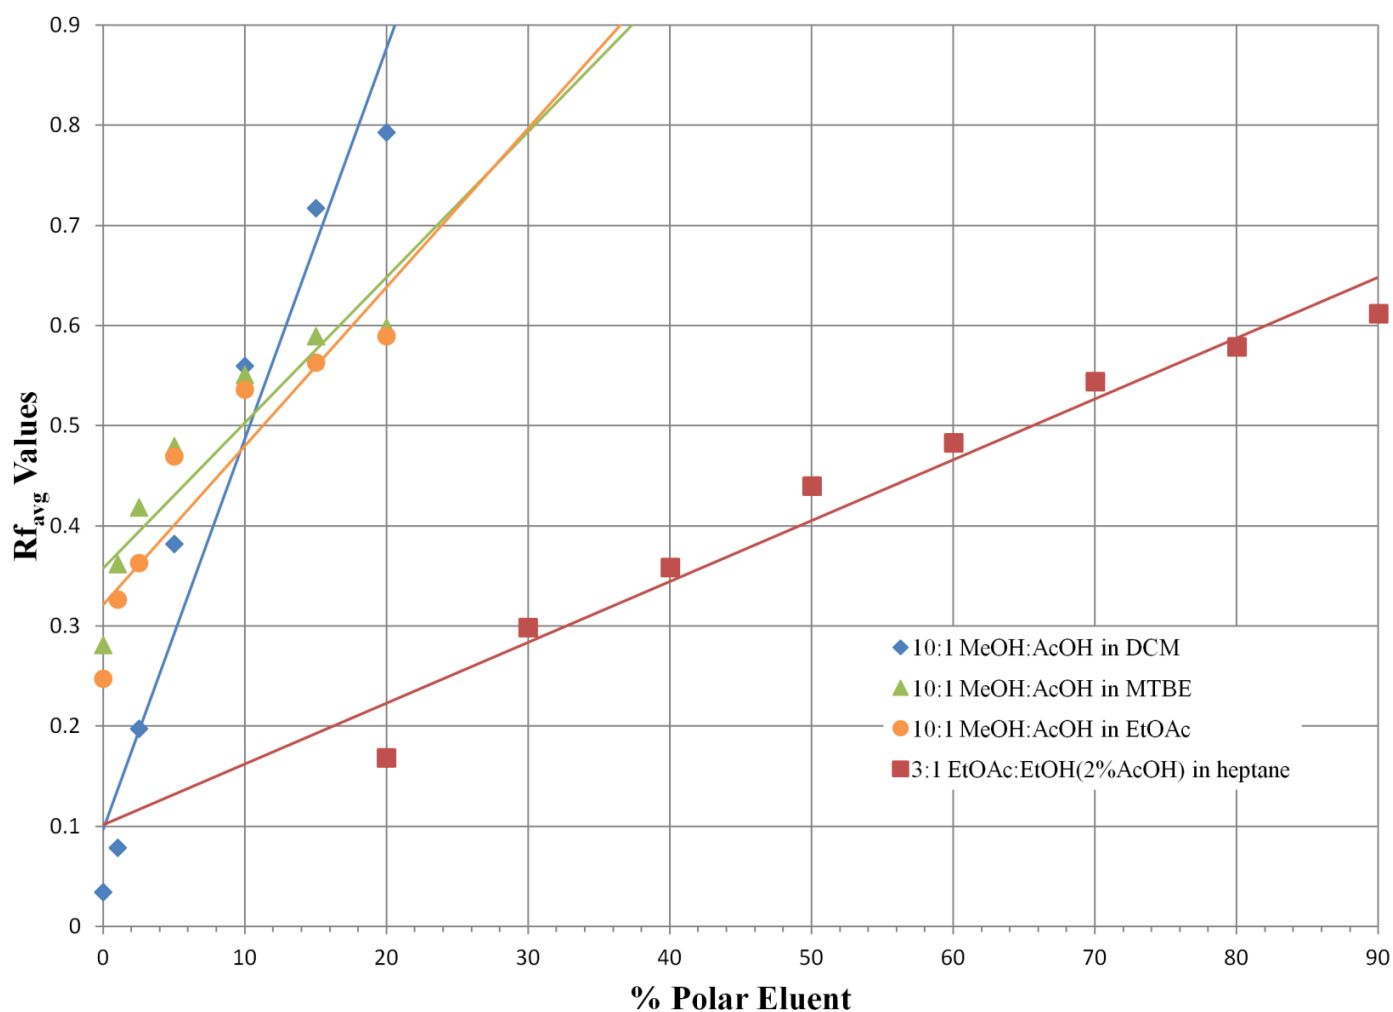

**Figure S3.**  $R_{f,avg}$  values for the acidic compound set tested in solvent systems modified with AcOH at increasing concentrations of polar eluent. Linear regression lines can be used to compare relative solvent eluting strength at different solvent concentrations.

Supporting Information  
Taygerly, Miller, Yee and Peterson  
**Table S8.** Individual R<sub>f</sub> values for acidic compounds tested in 10:1 MeOH:AcOH in DCM and 10:1 MeOH:AcOH in MTBE.

| Compound                                                                            | 100% DCM | 1% (10:1 MeOH:AcOH) in DCM | 2.5% (10:1 MeOH:AcOH) in DCM | 5% (10:1 MeOH:AcOH) in DCM | 10% (10:1 MeOH:AcOH) in DCM | 15% (10:1 MeOH:AcOH) in DCM | 20% (10:1 MeOH:AcOH) in DCM | 100% MTBE | 1% (10:1 MeOH:AcOH) in MTBE | 2.5% (10:1 MeOH:AcOH) in MTBE | 5% (10:1 MeOH:AcOH) in MTBE | 10% (10:1 MeOH:AcOH) in MTBE | 15% (10:1 MeOH:AcOH) in MTBE | 20% (10:1 MeOH:AcOH) in MTBE |
|-------------------------------------------------------------------------------------|----------|----------------------------|------------------------------|----------------------------|-----------------------------|-----------------------------|-----------------------------|-----------|-----------------------------|-------------------------------|-----------------------------|------------------------------|------------------------------|------------------------------|
|    | 0.02     | 0.05                       | 0.2                          | 0.35                       | 0.55                        | 0.7                         | 0.76                        | 0.22      | 0.36                        | 0.43                          | 0.51                        | 0.57                         | 0.61                         | 0.61                         |
|    | 0.02     | 0.07                       | 0.21                         | 0.38                       | 0.57                        | 0.72                        | 0.8                         | 0.27      | 0.39                        | 0.47                          | 0.53                        | 0.6                          | 0.63                         | 0.64                         |
|    | 0.02     | 0.06                       | 0.23                         | 0.4                        | 0.6                         | 0.72                        | 0.8                         | 0.27      | 0.36                        | 0.48                          | 0.54                        | 0.61                         | 0.64                         | 0.65                         |
|   | 0.02     | 0.06                       | 0.21                         | 0.38                       | 0.58                        | 0.7                         | 0.8                         | 0.17      | 0.29                        | 0.38                          | 0.49                        | 0.58                         | 0.62                         | 0.62                         |
|  | 0.03     | 0.08                       | 0.22                         | 0.4                        | 0.57                        | 0.72                        | 0.81                        | 0.28      | 0.41                        | 0.47                          | 0.53                        | 0.6                          | 0.64                         | 0.65                         |
|  | 0.07     | 0.13                       | 0.26                         | 0.46                       | 0.62                        | 0.76                        | 0.83                        | 0.57      | 0.6                         | 0.61                          | 0.62                        | 0.67                         | 0.69                         | 0.69                         |
|  | 0.02     | 0.01                       | 0.04                         | 0.25                       | 0.47                        | 0.7                         | 0.76                        | 0.03      | 0.03                        | 0.03                          | 0.08                        | 0.14                         | 0.21                         | 0.24                         |
|  | 0.02     | 0.01                       | 0.04                         | 0.18                       | 0.36                        | 0.59                        | 0.69                        | 0.11      | 0.17                        | 0.23                          | 0.34                        | 0.48                         | 0.55                         | 0.55                         |
|  | 0.09     | 0.24                       | 0.37                         | 0.64                       | 0.72                        | 0.85                        | 0.89                        | 0.61      | 0.65                        | 0.67                          | 0.68                        | 0.71                         | 0.72                         | 0.74                         |
| Average (R <sub>f,ave</sub> )                                                       | 0.03     | 0.08                       | 0.20                         | 0.38                       | 0.56                        | 0.72                        | 0.79                        | 0.28      | 0.36                        | 0.42                          | 0.48                        | 0.55                         | 0.59                         | 0.60                         |

Supporting Information

Taygerly, Miller, Yee and Peterson

**Table S9.** Individual R<sub>f</sub> values for acidic compounds tested in 10:1 MeOH:AcOH in EtOAc and 3:1 EtOAc:EtOH (modified with 2% AcOH) in heptanes

| Compound                                                                            | 100% EtOAc | 1% (10:1 MeOH:AcOH) in EtOAc | 2.5% (10:1 MeOH:AcOH) in EtOAc | 5% (10:1 MeOH:AcOH) in EtOAc | 10% (10:1 MeOH:AcOH) in EtOAc | 15% (10:1 MeOH:AcOH) in EtOAc | 20% (10:1 MeOH:AcOH) in EtOAc | 20% 3:1 EtOAc:EtOH (2% AcOH) in heptanes | 30% 3:1 EtOAc:EtOH (2% AcOH) in heptanes | 40% 3:1 EtOAc:EtOH (2% AcOH) in heptanes | 50% 3:1 EtOAc:EtOH (2% AcOH) in heptanes | 60% 3:1 EtOAc:EtOH (2% AcOH) in heptanes | 70% 3:1 EtOAc:EtOH (2% AcOH) in heptanes | 80% 3:1 EtOAc:EtOH (2% AcOH) in heptanes | 90% 3:1 EtOAc:EtOH (2% AcOH) in heptanes |
|-------------------------------------------------------------------------------------|------------|------------------------------|--------------------------------|------------------------------|-------------------------------|-------------------------------|-------------------------------|------------------------------------------|------------------------------------------|------------------------------------------|------------------------------------------|------------------------------------------|------------------------------------------|------------------------------------------|------------------------------------------|
|    | 0.17       | 0.31                         | 0.34                           | 0.46                         | 0.55                          | 0.58                          | 0.58                          | 0.15                                     | 0.3                                      | 0.36                                     | 0.44                                     | 0.48                                     | 0.55                                     | 0.58                                     | 0.63                                     |
|    | 0.2        | 0.33                         | 0.37                           | 0.49                         | 0.56                          | 0.59                          | 0.6                           | 0.2                                      | 0.34                                     | 0.4                                      | 0.49                                     | 0.52                                     | 0.58                                     | 0.6                                      | 0.63                                     |
|   | 0.2        | 0.31                         | 0.36                           | 0.49                         | 0.57                          | 0.6                           | 0.61                          | 0.2                                      | 0.35                                     | 0.41                                     | 0.49                                     | 0.53                                     | 0.59                                     | 0.61                                     | 0.64                                     |
|  | 0.19       | 0.31                         | 0.37                           | 0.49                         | 0.57                          | 0.59                          | 0.61                          | 0.1                                      | 0.3                                      | 0.32                                     | 0.46                                     | 0.5                                      | 0.56                                     | 0.6                                      | 0.62                                     |
|  | 0.25       | 0.36                         | 0.4                            | 0.52                         | 0.58                          | 0.6                           | 0.62                          | 0.17                                     | 0.32                                     | 0.39                                     | 0.47                                     | 0.52                                     | 0.58                                     | 0.61                                     | 0.64                                     |
|  | 0.47       | 0.46                         | 0.51                           | 0.61                         | 0.64                          | 0.66                          | 0.66                          | 0.26                                     | 0.42                                     | 0.49                                     | 0.55                                     | 0.59                                     | 0.64                                     | 0.66                                     | 0.68                                     |
|  | 0.03       | 0.05                         | 0.06                           | 0.1                          | 0.17                          | 0.23                          | 0.37                          | 0.03                                     | 0.04                                     | 0.09                                     | 0.1                                      | 0.15                                     | 0.21                                     | 0.27                                     | 0.35                                     |
|  | 0.12       | 0.17                         | 0.23                           | 0.4                          | 0.49                          | 0.53                          | 0.55                          | 0.05                                     | 0.13                                     | 0.22                                     | 0.34                                     | 0.42                                     | 0.5                                      | 0.56                                     | 0.59                                     |
|  | 0.6        | 0.64                         | 0.63                           | 0.67                         | 0.7                           | 0.69                          | 0.71                          | 0.36                                     | 0.49                                     | 0.55                                     | 0.62                                     | 0.64                                     | 0.69                                     | 0.72                                     | 0.73                                     |
| Average (R <sub>f_ave</sub> )                                                       | 0.25       | 0.33                         | 0.36                           | 0.47                         | 0.54                          | 0.56                          | 0.59                          | 0.17                                     | 0.30                                     | 0.36                                     | 0.44                                     | 0.48                                     | 0.54                                     | 0.58                                     | 0.61                                     |
